# Supplementary material for: Measuring decadal vertical land-level changes from SRTM-C (2000) and TanDEM-X ( ∼ 2015) in the south-central Andes
Source: Copernicus journal article supplement (doi:10.5194/esurf-6-971-2018), 2018-10-30
Supplement: Supplementary file 2 [file esurf-6-971-2018-supplement.zip]

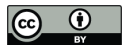

## *Supplement of*

# **Measuring decadal vertical land-level changes from SRTM-C (2000) and TanDEM-X (~ 2015) in the south-central Andes**

**Benjamin Purinton and Bodo Bookhagen**

*Correspondence to:* Ben Purinton ([purinton@uni-potsdam.de](mailto:purinton@uni-potsdam.de))

- [esurf-6-971-2018-supplement-title-page.pdf](#)
- [BP\\_dh\\_esurf\\_supp\\_v1.pdf](#)
- [Iterative-Shifting-Video.mp4](#)

The copyright of individual parts of the supplement might differ from the CC BY 4.0 License.
